# Supplementary material
Source: MDPI journal article supplement (https://www.mdpi.com/2076-3263/9/3/139)
Supplement: s1 [file s1]

## Appendix 4

| Chemical Parameters  | Database Median (ppm) | Subset Median (ppm) | $\Delta$ m.c (%) |
|----------------------|-----------------------|---------------------|------------------|
| Chloride             | 10                    | 37                  | 370%             |
| Amonium              | 0.08                  | 0.23                | 288%             |
| Sodium               | 14                    | 40                  | 286%             |
| Boron                | 0.046                 | 0.12                | 261%             |
| Calcium              | 26                    | 55                  | 212%             |
| Cadmium              | 0.00033               | 0.00067             | 203%             |
| Magnesium            | 4.3                   | 8.7                 | 202%             |
| Strontium            | 0.21                  | 0.4                 | 190%             |
| Manganese            | 0.017                 | 0.0305              | 179%             |
| Potassium            | 2.1                   | 3.5                 | 167%             |
| Sulfates             | 11                    | 18                  | 164%             |
| Tin                  | 0.0021                | 0.0034              | 162%             |
| Cobalt               | 0.0014                | 0.0023              | 161%             |
| Bicarbonates         | 146.4                 | 207.4               | 142%             |
| Bromide              | 2.5                   | 3.5                 | 140%             |
| Chromium             | 0.00099               | 0.00134             | 135%             |
| Barium               | 0.041                 | 0.055               | 134%             |
| Iron                 | 0.12                  | 0.15                | 125%             |
| Lead                 | 0.00033               | 0.00041             | 124%             |
| Lithium              | 0.015                 | 0.018               | 120%             |
| Fluoride             | 0.7                   | 0.8                 | 114%             |
| Silicium             | 5.7                   | 6.5                 | 114%             |
| Antimony             | 0.0016                | 0.0017              | 106%             |
| Molybdene            | 0.0017                | 0.0018              | 106%             |
| Aluminium            | 0.007                 | 0.00735             | 105%             |
| Zinc                 | 0.014                 | 0.0145              | 104%             |
| Nitrate              | 0.3                   | 0.3                 | 100%             |
| Nickel               | 0.0019                | 0.0019              | 100%             |
| Silver               | 0.00018               | 0.00018             | 100%             |
| Vanadium             | 0.0026                | 0.0023              | 88%              |
| Uranium              | 0.0021                | 0.0018              | 86%              |
| Inorganic phosphorus | 0.07                  | 0.05                | 71%              |
| Copper               | 0.0043                | 0.0027              | 63%              |
| Selenium             | 0.042                 | -                   | -                |
| Beryllium            | 0.0026                | -                   | -                |
| Titanium             | 0.0013                | -                   | -                |
| Bismuth              | 0.00072               | -                   | -                |
