# Supplementary material
Source: MDPI journal article supplement (https://www.mdpi.com/2076-3263/9/3/139)
Supplement: s1 [file s1]

## Appendix 5

The chemical composition of the 137 samples compiled in this study is given in the following Table. Data are grouped according to the study from which they were compiled and listed in the order of decreasing TDS values. Major elements ( $\text{Na}^+$ ,  $\text{Mg}^{2+}$ ,  $\text{K}^+$ ,  $\text{Ca}^{2+}$ ,  $\text{HCO}_3^-$ ,  $\text{Cl}^-$  and  $\text{SO}_4^{2-}$ ) were systematically analyzed in the 5 studies. Compared to the other studies, Frappe and Fritz (1987) analyzed 10 more metallic ions ( $\text{Al}^{3+}$ ,  $\text{Cd}^{2+}$ ,  $\text{Cr}^{2+}$ ,  $\text{Co}^{2+}$ ,  $\text{Cu}^{2+}$ ,  $\text{Mn}^{2+}$ ,  $\text{Ni}^{2+}$ ,  $\text{Zn}^{2+}$ ,  $\text{B}^{3+}$ ,  $\text{Pb}^{2+}$ ).  $\text{Sr}^{2+}$  and  $\text{Br}^-$  are only missing in Gascoyne and Kamineni (1994).

Frappe and Fritz (1987) provided a summary of the geochemistry of Canadian Shield groundwaters which have been partially presented in previous paper by the authors. For instance, compiled data by Frappe and Fritz (1987) include several data by Frappe et al. (1984) and Frappe and Fritz (1987). Frappe et al. (1984) analyzed chemical content of groundwater from a variety of locations in the crystalline rocks of the Canadian Shield in the province of Ontario (Yellowknife N.W.T and Sudbury Basin) and Manitoba (Thompson). The results of geochemical analyses discussed in Frappe and Fritz (1987) were obtained for groundwater samples collected in five mines and several shallow wells in the Sudbury Basin, Ontario, Canada. Mine samples were obtained from abandoned diamond drill holes or fractures from depths of 152-1219 m. Frappe and Fritz (1987) added data from Matagami area located in the province of Quebec. Chemical data from Bottomley et al. (1999) were collected at depths of 701 m to 1616 m in the Miramar Con gold mine, Yellowknife N.W.T., Canada. Most of the samples were collected from flowing boreholes. In the study by Bottomley et al. (1999) TDS for waters collected above approximately 650 meters and show concentrations for TDS less than 10,000 mg/L, and 22 over the 35 compiled samples show concentrations for TDS above 10,000 mg/L. Gascoyne and Kamineni (1994) determined the composition of groundwater in selected granitic, gabbroic and gneissic plutons in the Canadian Shield as part of the Canadian Nuclear Fuel Waste Management Program. Samples were collected in Ontario (Chalk River, Massey, and Atikokan) and Manitoba (Lac du Bonnet).

## Supplementary material

| N  | Sample    | Samples source          | Aquifer Type | TDS (mg/L) | T (°C) | Eh (mV) | pH | O.D (mg/L) | Na (mg/L) | Mg (mg/L) | K (mg/L) | Ca (mg/L) | HCO3 (mg/L) | Cl (mg/L) | SO4 (mg/L) | Al (mg/L) | Sb (mg/L) | Ag (mg/L) | Ba (mg/L) | Cd (mg/L) | Cr (mg/L) | Co (mg/L) | Cu (mg/L) | Mn (mg/L) | Mo (mg/L) | Ni (mg/L) | Zn (mg/L) | B (mg/L) | Fe (mg/L) | Li (mg/L) | Se (mg/L) | Sr (mg/L) | Sn (mg/L) | Ti (mg/L) | V (mg/L) | Be (mg/L) | Bi (mg/L) | Si (mg/L) | Pb (mg/L) | U (mg/L) | NH4 (mg/L) | Br (mg/L) | F (mg/L) | NO3 (mg/L) | P (mg/L) |   |   |   |   |   |   |   |   |   |   |
|----|-----------|-------------------------|--------------|------------|--------|---------|----|------------|-----------|-----------|----------|-----------|-------------|-----------|------------|-----------|-----------|-----------|-----------|-----------|-----------|-----------|-----------|-----------|-----------|-----------|-----------|----------|-----------|-----------|-----------|-----------|-----------|-----------|----------|-----------|-----------|-----------|-----------|----------|------------|-----------|----------|------------|----------|---|---|---|---|---|---|---|---|---|---|
| 17 | L261400   | Frage and Fritz (1982)  | Roc          | -          | -      | -       | -  | 213        | 0.05      | 47.1      | 150      | -         | 431         | 259       | -          | -         | -         | -         | -         | -         | -         | -         | -         | 0.05      | -         | -         | -         | -        | -         | 0.05      | -         | 3.3       | -         | -         | -        | -         | -         | -         | -         | -        | -          | -         | -        | -          | -        | - | - |   |   |   |   |   |   |   |   |
| 6  | N3601     | Frage and Fritz (1982)  | Roc          | 240632     | -      | -       | -  | 160        | 0.05      | 85        | 160      | -         | 156000      | 138       | -          | -         | -         | -         | -         | -         | -         | -         | -         | 0.05      | -         | -         | -         | -        | -         | 0.05      | -         | 1.7       | -         | -         | -        | -         | -         | -         | -         | -        | -          | -         | -        | -          | -        | - | - |   |   |   |   |   |   |   |   |
| 3  | N3640     | Frage and Fritz (1982)  | Roc          | 225446     | -      | -       | -  | 20750      | 8.3       | 250       | 58750    | 30.6      | 142000      | 155       | -          | -         | -         | -         | -         | -         | -         | -         | -         | 1.3       | -         | -         | -         | -        | -         | 5         | -         | 2060      | -         | -         | -        | -         | -         | -         | -         | -        | -          | -         | -        | -          | -        | - | - | - |   |   |   |   |   |   |   |
| 29 | CCS2000   | Frage and Fritz (1982)  | Roc          | 940267     | -      | -       | -  | 6000       | 96        | 44        | 24000    | 8.4       | -           | 1.4       | -          | -         | -         | -         | -         | -         | -         | -         | -         | 1.4       | -         | -         | -         | -        | -         | 8.1       | -         | 3.7       | -         | -         | -        | -         | -         | -         | -         | -        | -          | -         | -        | -          | -        | - | - |   |   |   |   |   |   |   |   |
| 28 | CCS3200   | Frage and Fritz (1982)  | Roc          | 85789      | -      | -       | -  | 7500       | 82        | 42        | 22000    | 14.3      | 55200       | 75.6      | -          | -         | -         | -         | -         | -         | -         | -         | 1.25      | -         | -         | -         | -         | -        | 3.5       | -         | 395       | -         | -         | -         | -        | -         | -         | -         | -         | -        | -          | -         | -        | -          | -        | - | - |   |   |   |   |   |   |   |   |
| 8  | F33182    | Frage and Fritz (1982)  | Roc          | 29737      | -      | -       | -  | 3500       | 13.95     | 87        | 6800     | 8.8       | 18500       | 566       | -          | -         | -         | -         | -         | -         | -         | -         | 0.31      | -         | -         | -         | -         | -        | 2         | -         | 123       | -         | -         | -         | -        | -         | -         | -         | -         | -        | -          | -         | -        | -          | -        | - | - | - |   |   |   |   |   |   |   |
| 12 | L40140    | Frage and Fritz (1982)  | Roc          | 23170      | -      | -       | -  | 2313       | 24.7      | 468       | 42       | 1         | 16000       | 42.3      | -          | -         | -         | -         | -         | -         | -         | -         | 0.05      | -         | -         | -         | -         | -        | 5.15      | -         | 0.05      | -         | 0.05      | -         | -        | -         | -         | -         | -         | -        | -          | -         | -        | -          | -        | - | - |   |   |   |   |   |   |   |   |
| 7  | F33300    | Frage and Fritz (1982)  | Roc          | 22594      | -      | -       | -  | 2625       | 4         | 32        | 4800     | 9.9       | 14400       | 530       | -          | -         | -         | -         | -         | -         | -         | -         | 0.14      | -         | -         | -         | -         | -        | 1         | -         | 90        | -         | -         | -         | -        | -         | -         | -         | -         | -        | -          | -         | -        | -          | -        | - | - | - |   |   |   |   |   |   |   |
| 9  | F33170    | Frage and Fritz (1982)  | Roc          | 21689      | -      | -       | -  | 3400       | 22.5      | 22        | 4650     | 10.5      | 13900       | 516       | -          | -         | -         | -         | -         | -         | -         | -         | 0.11      | -         | -         | -         | -         | -        | 0.75      | -         | 88        | -         | -         | -         | -        | -         | -         | -         | -         | -        | -          | -         | -        | -          | -        | - | - | - |   |   |   |   |   |   |   |
| 9  | F33182    | Frage and Fritz (1982)  | Roc          | 17713      | -      | -       | -  | 2200       | 20.8      | 3625      | 9.3      | 11500     | 486         | -         | -          | -         | -         | -         | -         | -         | -         | -         | 0.1       | -         | -         | -         | -         | -        | 0.37      | -         | 73        | -         | -         | -         | -        | -         | -         | -         | -         | -        | -          | -         | -        | -          | -        | - | - | - | - |   |   |   |   |   |   |
| 14 | L40143    | Frage and Fritz (1982)  | Roc          | 13128      | -      | -       | -  | 2375       | 19.4      | 2938      | 68.1     | 8540      | 26.7        | -         | -          | -         | -         | -         | -         | -         | -         | -         | 0.62      | -         | -         | -         | -         | -        | 0.37      | -         | 60        | -         | -         | -         | -        | -         | -         | -         | -         | -        | -          | -         | -        | -          | -        | - | - | - | - | - |   |   |   |   |   |
| 13 | L40141    | Frage and Fritz (1982)  | Roc          | 6862       | -      | -       | -  | 800        | 3.78      | 12.2      | 1560     | 96.2      | 4160        | 40        | -          | -         | -         | -         | -         | -         | -         | -         | 0.4       | -         | -         | -         | -         | -        | 0.15      | -         | 30.5      | -         | -         | -         | -        | -         | -         | -         | -         | -        | -          | -         | -        | -          | -        | - | - | - | - | - | - |   |   |   |   |
| 2  | N3602     | Frage and Fritz (1982)  | Roc          | 6290       | -      | -       | -  | 800        | 1.78      | 8.6       | 1380     | 7.6       | 3820        | 190       | -          | -         | -         | -         | -         | -         | -         | -         | 0.05      | -         | -         | -         | -         | -        | 0.47      | -         | 32        | -         | -         | -         | -        | -         | -         | -         | -         | -        | -          | -         | -        | -          | -        | - | - | - | - | - | - | - |   |   |   |
| 1  | N3601     | Frage and Fritz (1982)  | Roc          | 5303       | -      | -       | -  | 675        | 1.38      | 7.4       | 1050     | 8.7       | 3310        | 180       | -          | -         | -         | -         | -         | -         | -         | -         | 0.05      | -         | -         | -         | -         | -        | 0.15      | -         | 25.4      | -         | -         | -         | -        | -         | -         | -         | -         | -        | -          | -         | -        | -          | -        | - | - | - | - | - | - |   |   |   |   |
| 11 | L40139    | Frage and Fritz (1982)  | Roc          | 4538       | -      | -       | -  | 700        | 2.65      | 26        | 855      | 113       | 2710        | 46.2      | -          | -         | -         | -         | -         | -         | -         | -         | 0.25      | -         | -         | -         | -         | -        | 0.2       | -         | 16.3      | -         | -         | -         | -        | -         | -         | -         | -         | -        | -          | -         | -        | -          | -        | - | - | - | - | - | - | - |   |   |   |
| 30 | G1600     | Frage and Fritz (1982)  | Roc          | 4279       | -      | -       | -  | 180        | 330       | 23.5      | 480      | 213       | 97          | 2950      | -          | -         | -         | -         | -         | -         | -         | -         | 0.05      | -         | -         | -         | -         | -        | 0.3       | -         | 4         | -         | -         | -         | -        | -         | -         | -         | -         | -        | -          | -         | -        | -          | -        | - | - | - | - | - | - | - | - |   |   |
| 4  | N3643     | Frage and Fritz (1982)  | Roc          | 4113       | -      | -       | -  | 500        | 6.1       | 6.4       | 800      | 28.2      | 2220        | 160       | -          | -         | -         | -         | -         | -         | -         | -         | 0.15      | -         | -         | -         | -         | -        | 0.15      | -         | 18.9      | -         | -         | -         | -        | -         | -         | -         | -         | -        | -          | -         | -        | -          | -        | - | - | - | - | - | - | - | - |   |   |
| 26 | CCS20002  | Frage and Fritz (1982)  | Roc          | 3889       | -      | -       | -  | 425        | 42        | 9.2       | 580      | 107       | 1470        | 1320      | -          | -         | -         | -         | -         | -         | -         | -         | 0.05      | -         | -         | -         | -         | -        | 13        | -         | 5.6       | -         | -         | -         | -        | -         | -         | -         | -         | -        | -          | -         | -        | -          | -        | - | - | - | - | - | - | - | - |   |   |
| 25 | CCS26001  | Frage and Fritz (1982)  | Roc          | 3544       | -      | -       | -  | 440        | 44.5      | 8         | 590      | 111       | 985         | 1340      | -          | -         | -         | -         | -         | -         | -         | -         | 0.46      | -         | -         | -         | -         | -        | 3.5       | -         | 5.7       | -         | -         | -         | -        | -         | -         | -         | -         | -        | -          | -         | -        | -          | -        | - | - | - | - | - | - | - | - |   |   |
| 27 | CCS26003  | Frage and Fritz (1982)  | Roc          | 3076       | -      | -       | -  | 385        | 8.1       | 5.8       | 205      | 19.3      | 1280        | 738       | -          | -         | -         | -         | -         | -         | -         | -         | 0.05      | -         | -         | -         | -         | -        | 0.25      | -         | 6.8       | -         | -         | -         | -        | -         | -         | -         | -         | -        | -          | -         | -        | -          | -        | - | - | - | - | - | - | - | - |   |   |
| 18 | L261450   | Frage and Fritz (1982)  | Roc          | 2596       | -      | -       | -  | 370        | 0.05      | 300       | 28       | 864       | 620         | 223       | -          | -         | -         | -         | -         | -         | -         | -         | 0.05      | -         | -         | -         | -         | -        | 0.13      | -         | 5.6       | -         | -         | -         | -        | -         | -         | -         | -         | -        | -          | -         | -        | -          | -        | - | - | - | - | - | - | - | - |   |   |
| 16 | L261350   | Frage and Fritz (1982)  | Roc          | 1964       | -      | -       | -  | 250        | 15.45     | 7.6       | 380      | 127       | 870         | 282       | -          | -         | -         | -         | -         | -         | -         | -         | 0.24      | -         | -         | -         | -         | -        | 0.05      | -         | 7.6       | -         | -         | -         | -        | -         | -         | -         | -         | -        | -          | -         | -        | -          | -        | - | - | - | - | - | - | - | - |   |   |
| 22 | CCS084421 | Frage and Fritz (1982)  | Roc          | 1888       | -      | -       | -  | 70         | 103.5     | 17        | 217      | 152       | 38          | 1240      | -          | -         | -         | -         | -         | -         | -         | -         | 0.5       | -         | -         | -         | -         | -        | 26        | -         | 1.7       | -         | -         | -         | -        | -         | -         | -         | -         | -        | -          | -         | -        | -          | -        | - | - | - | - | - | - | - | - |   |   |
| 23 | CCS084422 | Frage and Fritz (1982)  | Roc          | 1295       | -      | -       | -  | 36         | 74        | 11.7      | 155      | 190       | 26          | 768       | -          | -         | -         | -         | -         | -         | -         | -         | 0.3       | -         | -         | -         | -         | -        | 8.3       | -         | 0.7       | -         | -         | -         | -        | -         | -         | -         | -         | -        | -          | -         | -        | -          | -        | - | - | - | - | - | - | - | - | - |   |
| 21 | L22450    | Frage and Fritz (1982)  | Roc          | 1282       | -      | -       | -  | 140        | 16.3      | 5.8       | 207      | 211       | 408         | 237       | -          | -         | -         | -         | -         | -         | -         | -         | 0.33      | -         | -         | -         | -         | -        | 0.15      | -         | 3.3       | -         | -         | -         | -        | -         | -         | -         | -         | -        | -          | -         | -        | -          | -        | - | - | - | - | - | - | - | - |   |   |
| 19 | L261550   | Frage and Fritz (1982)  | Roc          | 1061       | -      | -       | -  | 145        | 0.05      | 44        | 129      | 213       | 180         | 355       | -          | -         | -         | -         | -         | -         | -         | -         | 0.05      | -         | -         | -         | -         | -        | 0.05      | -         | 1.6       | -         | -         | -         | -        | -         | -         | -         | -         | -        | -          | -         | -        | -          | -        | - | - | - | - | - | - | - | - |   |   |
| 24 | CCS08481  | Frage and Fritz (1982)  | Roc          | 791        | -      | -       | -  | 26         | 29        | 4.4       | 118      | 129       | 11          | 480       | -          | -         | -         | -         | -         | -         | -         | -         | 0.05      | -         | -         | -         | -         | -        | 0.25      | -         | 0.9       | -         | -         | -         | -        | -         | -         | -         | -         | -        | -          | -         | -        | -          | -        | - | - | - | - | - | - | - | - | - |   |
| 1  | N3644     | Frage and Fritz (1982)  | Roc          | 264        | -      | -       | -  | 58         | 3.08      | 1.3       | 22       | 24        | 84          | 145       | -          | -         | -         | -         | -         | -         | -         | -         | 0.05      | -         | -         | -         | -         | -        | 0.05      | -         | 0.12      | -         | -         | -         | -        | -         | -         | -         | -         | -        | -          | -         | -        | -          | -        | - | - | - | - | - | - | - | - | - |   |
| 31 | L26000    | Frage and Fritz (1982)  | Roc          | 220        | -      | -       | -  | 1          | 7.88      | 2.4       | 28       | 18.8      | 92          | 24.3      | -          | -         | -         | -         | -         | -         | -         | -         | 0.05      | -         | -         | -         | -         | -        | 0.05      | -         | 0.05      | -         | -         | -         | -        | -         | -         | -         | -         | -        | -          | -         | -        | -          | -        | - | - | - | - | - | - | - | - |   |   |
| 32 | L26000    | Frage and Fritz (1982)  | Roc          | 187        | -      | -       | -  | 30         | 6.03      | 1.8       | 21       | 23.2      | 63          | 25.4      | -          | -         | -         | -         | -         | -         | -         | -         | 0.05      | -         | -         | -         | -         | -        | 0.05      | -         | 0.05      | -         | -         | -         | -        | -         | -         | -         | -         | -        | -          | -         | -        | -          | -        | - | - | - | - | - | - | - | - |   |   |
| 15 | L26000    | Frage and Fritz (1982)  | Roc          | 128        | -      | -       | -  | 12         | 2.85      | 1.7       | 16       | 32.5      | 7           | 43        | -          | -         | -         | -         | -         | -         | -         | -         | 0.11      | -         | -         | -         | -         | -        | 5         | -         | 0.1       | -         | -         | -         | -        | -         | -         | -         | -         | -        | -          | -         | -        | -          | -        | - | - | - | - | - | - | - | - | - |   |
| 33 | L26000    | Frage and Fritz (1982)  | Roc          | 107        | -      | -       | -  | 19         | 2.9       | 2         | 10       | 11.8      | 34          | 17.5      | -          | -         | -         | -         | -         | -         | -         | -         | 0.05      | -         | -         | -         | -         | -        | 0.1       | -         | 0.05      | -         | -         | -         | -        | -         | -         | -         | -         | -        | -          | -         | -        | -          | -        | - | - | - | - | - | - | - | - | - |   |
| 34 | Y5        | Bottomley et al. (1999) | Roc          | -          | -      | -       | -  | 995        | 75        | 7.8       | 728      | 256       | 2015        | 1168      | -          | -         | -         | -         | -         | -         | -         | -         | 0.068     | -         | -         | -         | -         | -        | 1.285     | -         | 0.099     | -         | 11        | -         | -        | -         | -         | -         | -         | -        | -          | -         | -        | -          | -        | - | - | - | - | - | - | - | - | - | - |
| 35 | B646      | Bottomley et al. (1999) | Roc          | -          | -      | -       | -  | 195        | 268       | 5.1       | 309      | 680       | 1145        | 0.804     | -          | -         | -         | -         | -         | -         | -         | -         | 0.145     | -         | -         | -         | -         | -        | 0.049     | -         | 4         | -         | -         | -         | -        | -         | -         | -         | -         | -        | -          | -         | -        | -          | -        | - | - | - | - | - | - | - | - | - |   |
| 36 | Seep      | Bottomley et al. (1999) | Roc          | -          | -      | -       | -  | 1585       | 324       | 12.5      | 2265     | 112       | 6471        | 880       | -          | -         | -         | -         | -         | -         | -         | -         | 0.111     | -         | -         | -         | -         | -        | 2.321     | -         | 0.23      | -         | 30        | -         | -        | -         | -         | -         | -         | -        | -          | -         | -        | -          | -        | - | - | - | - | - | - | - | - | - | - |
| 37 | B8946     | Bottomley et al. (1999) | Roc          | -          | -      | -       | -  | 32         | 2.18      | 184       | 426      | 308       | 113         | 0.023     | -          | -         | -         | -         | -         | -         | -         | -         | 0.005     | -         | -         | -         | -         | -        | 0.059     | -         | 0.09      | -         | 11.2      | -         | -        | -         | -         | -         | -         | -        | -          | -         | -        | -          | -        | - | - | - | - | - | - | - | - | - | - |
| 38 | B9362     | Bottomley et al. (1999) | Roc          | -          | -      | -       | -  | 2614       | 40        | 10.3      | 2095     | 20        | 7136        | -         | -          | -         | -         | -         | -         | -         | -         | -         | 0.065     | -         | -         | -         | -         | -        | 2.076     | -         | 0.218     | -         | 38        | -         | -        | -         | -         | -         | -         | -        | -          | -         | -        | -          | -        | - | - | - | - | - | - | - | - | - | - |
| 39 | B9452     | Bottomley et al. (1999) | Roc          | -          |        |         |    |            |           |           |          |           |             |           |            |           |           |           |           |           |           |           |           |           |           |           |           |          |           |           |           |           |           |           |          |           |           |           |           |          |            |           |          |            |          |   |   |   |   |   |   |   |   |   |   |

[illegible]
