# Supplementary material
Source: MDPI journal article supplement (https://www.mdpi.com/2076-3263/9/3/139)
Supplement: s1 [file s1]

CORRELATION MATRIX FOR THE DATABASE (321 SAMPLES)

|      | Na    | Mg    | K     | Ca    | HCO3  | Cl    | SO4   | Al    | Sb    | Ag    | Ba    | Cd    | Cr    | Co    | Cu    | Mn    | Mo    | Ni    | Zn    | B     | Fe    | Li    | Se    | Sr    | Sn    | Ti    | V     | Be    | Bi    | Si    | Pb    | U     | NH4   | Br      | F     | NO3   | P     |
|------|-------|-------|-------|-------|-------|-------|-------|-------|-------|-------|-------|-------|-------|-------|-------|-------|-------|-------|-------|-------|-------|-------|-------|-------|-------|-------|-------|-------|-------|-------|-------|-------|-------|---------|-------|-------|-------|
| Na   |       | 0.86  | 0.86  | 0.31  | 0.47  | 0.91  | 0.78  | -0.03 | -0.05 | 0.07  | 0.13  | -0.04 | 0.02  | -0.05 | -0.10 | 0.05  | 0.21  | 0.02  | -0.07 | 0.53  | 0.04  | 0.32  | -0.22 | 0.43  | 0.03  | 0.00  | -0.16 | -0.02 | -0.02 | 0.18  | 0.28  | 0.00  | 0.66  | 0.57    | 0.32  | -0.12 | 0.08  |
| Mg   | 0.86  |       | 0.83  | 0.35  | 0.40  | 0.84  | 0.78  | -0.06 | -0.04 | -0.01 | 0.24  | -0.03 | 0.00  | -0.03 | -0.07 | 0.09  | 0.13  | 0.06  | -0.05 | 0.39  | 0.04  | 0.28  | -0.16 | 0.46  | -0.01 | -0.01 | -0.09 | -0.02 | -0.01 | 0.23  | 0.30  | 0.00  | 0.65  | 0.55    | 0.14  | -0.06 | 0.04  |
| K    | 0.86  | 0.83  |       | 0.12  | 0.60  | 0.71  | 0.73  | -0.01 | -0.05 | 0.08  | 0.09  | -0.04 | -0.03 | -0.02 | -0.07 | 0.06  | 0.07  | 0.05  | -0.08 | 0.42  | 0.10  | 0.15  | -0.18 | 0.18  | 0.04  | 0.01  | -0.08 | 0.00  | -0.02 | 0.32  | 0.19  | 0.00  | 0.57  | 0.34    | 0.23  | -0.07 | 0.08  |
| Ca   | 0.31  | 0.35  | 0.12  |       | 0.00  | 0.65  | 0.34  | -0.04 | -0.03 | -0.04 | 0.21  | -0.03 | -0.02 | -0.02 | -0.05 | 0.16  | 0.17  | 0.01  | -0.06 | 0.17  | 0.08  | 0.71  | -0.20 | 0.93  | -0.03 | -0.02 | -0.11 | -0.02 | -0.02 | -0.10 | 0.54  | -0.01 | 0.34  | 0.90    | 0.12  | -0.03 | 0.03  |
| HCO3 | 0.47  | 0.40  | 0.60  | 0.00  |       | 0.29  | 0.37  | -0.01 | -0.06 | 0.25  | 0.10  | -0.01 | -0.04 | -0.02 | -0.12 | 0.08  | 0.15  | 0.02  | -0.19 | 0.40  | -0.01 | 0.01  | -0.13 | -0.01 | 0.12  | 0.13  | -0.01 | -0.02 | -0.03 | 0.24  | 0.00  | 0.10  | 0.39  | 0.06    | 0.42  | -0.03 | 0.17  |
| Cl   | 0.91  | 0.84  | 0.71  | 0.65  | 0.29  |       | 0.74  | -0.04 | -0.05 | 0.01  | 0.21  | -0.05 | 0.01  | -0.05 | -0.09 | 0.10  | 0.22  | 0.02  | -0.05 | 0.46  | 0.07  | 0.52  | -0.24 | 0.73  | 0.00  | -0.02 | -0.17 | -0.02 | -0.02 | 0.09  | 0.45  | -0.02 | 0.67  | 0.83    | 0.24  | -0.11 | 0.06  |
| SO4  | 0.78  | 0.78  | 0.73  | 0.34  | 0.37  | 0.74  |       | -0.04 | -0.04 | -0.03 | -0.02 | -0.03 | 0.01  | -0.05 | -0.09 | 0.04  | 0.24  | 0.03  | -0.06 | 0.34  | 0.00  | 0.22  | -0.21 | 0.41  | 0.02  | -0.02 | -0.15 | -0.02 | -0.02 | 0.19  | 0.31  | 0.05  | 0.53  | 0.47    | 0.29  | -0.09 | 0.04  |
| Al   | -0.03 | -0.06 | -0.01 | -0.04 | -0.01 | -0.04 | -0.04 |       | -0.02 | -0.01 | -0.08 | -0.01 | -0.03 | 0.02  | 0.01  | -0.04 | -0.04 | -0.01 | -0.03 | 0.00  | -0.03 | -0.04 | -0.06 | -0.03 | -0.01 | 0.30  | 0.03  | -0.02 | 0.04  | -0.03 | 0.07  | -0.08 | 0.01  | -0.03   | 0.01  | -0.01 | 0.40  |
| Sb   | -0.05 | -0.04 | -0.05 | -0.03 | -0.06 | -0.05 | -0.04 | -0.02 |       | 0.01  | -0.02 | -0.02 | -0.02 | -0.02 | 0.12  | -0.04 | -0.01 | -0.01 | 0.15  | -0.05 | -0.02 | -0.02 | 0.02  | -0.04 | 0.19  | -0.01 | -0.01 | -0.01 | -0.01 | -0.03 | -0.04 | 0.01  | -0.06 | -0.04   | -0.09 | 0.00  | 0.08  |
| Ag   | 0.07  | -0.01 | 0.08  | -0.04 | 0.25  | 0.01  | -0.03 | -0.01 | 0.01  |       | -0.02 | 0.00  | 0.00  | -0.02 | 0.01  | -0.02 | 0.09  | -0.03 | -0.03 | 0.06  | -0.02 | -0.01 | 0.03  | -0.03 | 0.01  | -0.01 | 0.00  | -0.01 | -0.11 | -0.05 | -0.03 | 0.13  | -0.02 | 0.07    | -0.04 | -0.02 |       |
| Ba   | 0.13  | 0.24  | 0.09  | 0.21  | 0.10  | 0.21  | -0.02 | -0.08 | -0.02 | -0.02 |       | -0.02 | -0.02 | -0.03 | -0.03 | 0.04  | -0.01 | -0.04 | -0.08 | 0.20  | 0.00  | 0.27  | -0.07 | 0.32  | -0.03 | -0.01 | -0.01 | -0.01 | -0.01 | -0.04 | 0.09  | -0.01 | 0.46  | 0.28    | 0.05  | -0.07 | 0.03  |
| Cd   | -0.04 | -0.03 | -0.04 | -0.03 | -0.01 | -0.05 | -0.03 | -0.01 | -0.02 | 0.00  | -0.02 |       | 0.02  | 0.06  | 0.00  | 0.01  | -0.04 | 0.02  | 0.01  | -0.04 | -0.02 | -0.03 | 0.02  | -0.03 | -0.01 | -0.01 | -0.01 | 0.03  | 0.46  | 0.01  | -0.02 | 0.00  | -0.05 | -0.04   | 0.00  | 0.04  | -0.03 |
| Cr   | 0.02  | 0.00  | -0.03 | -0.02 | -0.04 | 0.01  | 0.01  | -0.03 | -0.02 | 0.00  | -0.02 | 0.02  |       | 0.09  | -0.03 | 0.07  | 0.06  | 0.49  | 0.00  | 0.00  | 0.03  | 0.01  | 0.03  | 0.01  | 0.02  | -0.01 | 0.02  | 0.00  | 0.08  | 0.02  | -0.06 | -0.04 | 0.01  | -0.01   | -0.03 | 0.01  | -0.02 |
| Co   | -0.05 | -0.03 | -0.02 | -0.02 | -0.02 | -0.05 | -0.05 | 0.02  | -0.02 | -0.02 | -0.03 | 0.06  | 0.09  |       | -0.03 | 0.74  | -0.05 | 0.27  | 0.18  | -0.05 | 0.23  | -0.03 | 0.02  | -0.05 | -0.01 | -0.01 | 0.08  | 0.02  | 0.09  | 0.20  | -0.05 | -0.04 | -0.05 | -0.11   | -0.03 | -0.03 |       |
| Cu   | -0.10 | -0.07 | -0.07 | -0.05 | -0.12 | -0.09 | -0.09 | 0.01  | 0.12  | 0.01  | -0.03 | 0.00  | -0.03 | -0.03 |       | -0.07 | -0.10 | 0.02  | 0.03  | -0.10 | -0.03 | -0.05 | 0.02  | -0.07 | -0.02 | -0.02 | 0.01  | 0.44  | -0.01 | -0.07 | 0.01  | -0.07 | -0.10 | -0.07   | -0.16 | 0.10  | -0.02 |
| Mn   | 0.05  | 0.09  | 0.06  | 0.16  | 0.08  | 0.10  | 0.04  | -0.04 | -0.04 | -0.02 | 0.04  | 0.01  | 0.07  | 0.74  | -0.07 |       | 0.03  | 0.29  | 0.08  | -0.03 | 0.35  | 0.03  | -0.02 | 0.12  | -0.02 | 0.00  | 0.04  | -0.01 | -0.02 | 0.14  | 0.04  | -0.02 | 0.08  | 0.10    | -0.09 | -0.03 | -0.04 |
| Mo   | 0.21  | 0.13  | 0.07  | 0.17  | 0.15  | 0.22  | 0.24  | -0.04 | -0.01 | 0.09  | -0.01 | -0.04 | 0.06  | -0.05 | -0.10 | 0.03  |       | -0.06 | -0.08 | 0.15  | -0.06 | 0.17  | -0.06 | 0.23  | 0.06  | 0.02  | -0.01 | -0.01 | -0.03 | -0.10 | 0.03  | 0.30  | 0.14  | 0.20    | 0.52  | -0.16 | 0.06  |
| Ni   | 0.02  | 0.06  | 0.05  | 0.01  | 0.02  | 0.02  | 0.03  | -0.01 | -0.01 | -0.03 | -0.04 | 0.02  | 0.49  | 0.27  | 0.02  | 0.29  | -0.06 |       | 0.15  | -0.02 | 0.22  | -0.02 | -0.01 | 0.00  | -0.01 | -0.01 | 0.01  | -0.02 | -0.02 | 0.16  | 0.02  | -0.06 | 0.02  | 0.01    | -0.09 | -0.03 | -0.05 |
| Zn   | -0.07 | -0.05 | -0.08 | -0.06 | -0.19 | -0.05 | -0.06 | -0.03 | 0.15  | -0.03 | -0.08 | 0.01  | 0.00  | 0.18  | 0.03  | 0.08  | -0.08 | 0.15  |       | -0.10 | 0.23  | -0.04 | 0.05  | -0.05 | -0.01 | -0.03 | 0.01  | -0.01 | -0.01 | 0.12  | -0.05 | -0.09 | -0.10 | -0.06   | -0.19 | 0.05  | -0.05 |
| B    | 0.53  | 0.39  | 0.42  | 0.17  | 0.40  | 0.46  | 0.34  | 0.00  | -0.05 | 0.06  | 0.20  | -0.04 | 0.00  | -0.05 | -0.10 | -0.03 | 0.15  | -0.02 | -0.10 |       | 0.01  | 0.40  | -0.25 | 0.28  | 0.03  | 0.02  | -0.18 | -0.02 | -0.01 | 0.01  | 0.23  | 0.01  | 0.53  | 0.35    | 0.43  | -0.13 | 0.09  |
| Fe   | 0.04  | 0.04  | 0.10  | 0.08  | -0.01 | 0.07  | 0.00  | -0.03 | -0.02 | -0.02 | 0.00  | -0.02 | 0.03  | 0.23  | -0.03 | 0.35  | -0.06 | 0.22  | 0.23  | 0.01  |       | 0.02  | 0.01  | 0.06  | -0.02 | 0.01  | -0.04 | 0.01  | -0.01 | 0.27  | 0.10  | -0.05 | 0.06  | 0.08    | -0.06 | -0.07 | -0.02 |
| Li   | 0.32  | 0.28  | 0.15  | 0.71  | 0.01  | 0.52  | 0.22  | -0.04 | -0.02 | -0.01 | 0.27  | -0.03 | 0.01  | -0.03 | -0.05 | 0.03  | 0.17  | -0.02 | -0.04 | 0.40  | 0.02  |       | -0.10 | 0.72  | -0.02 | -0.01 | -0.08 | -0.01 | -0.01 | -0.09 | 0.15  | -0.02 | 0.35  | 0.74    | 0.18  | -0.07 | 0.02  |
| Se   | -0.22 | -0.16 | -0.18 | -0.20 | -0.13 | -0.24 | -0.21 | -0.06 | 0.02  | 0.03  | -0.07 | 0.02  | 0.03  | 0.02  | 0.02  | -0.02 | -0.06 | -0.01 | 0.05  | -0.25 | 0.01  | -0.10 |       | -0.21 | 0.01  | 0.01  | 0.19  | 0.01  | 0.01  | 0.01  | -0.38 | -0.01 | -0.31 | -0.26   | -0.14 | 0.05  | -0.08 |
| Sr   | 0.43  | 0.46  | 0.18  | 0.93  | -0.01 | 0.73  | 0.41  | -0.03 | -0.04 | -0.03 | 0.32  | -0.03 | 0.01  | -0.05 | -0.07 | 0.12  | 0.23  | 0.00  | -0.05 | 0.28  | 0.06  | 0.72  | -0.21 |       | -0.02 | -0.02 | -0.14 | -0.02 | -0.01 | -0.11 | 0.51  | -0.01 | 0.49  | 0.94    | 0.22  | -0.10 | 0.04  |
| Sn   | 0.03  | -0.01 | 0.04  | -0.03 | 0.12  | 0.00  | 0.02  | -0.01 | 0.19  | 0.01  | -0.03 | -0.01 | 0.02  | -0.01 | -0.02 | -0.02 | 0.06  | -0.01 | -0.01 | 0.03  | -0.02 | -0.02 | 0.01  | -0.02 |       | -0.01 | -0.01 | -0.01 | 0.00  | 0.05  | -0.03 | 0.02  | 0.00  | -0.02   | 0.06  | -0.02 | 0.03  |
| Ti   | 0.00  | -0.01 | 0.01  | -0.02 | 0.13  | -0.02 | -0.02 | 0.30  | -0.01 | -0.01 | -0.01 | -0.01 | -0.01 | -0.01 | -0.02 | 0.00  | 0.02  | -0.01 | -0.03 | 0.02  | 0.01  | -0.01 | 0.01  | -0.02 | -0.01 |       | 0.00  | 0.00  | 0.04  | -0.03 | -0.02 | -0.01 | -0.02 | 0.07    | -0.03 | 0.55  |       |
| V    | -0.16 | -0.09 | -0.08 | -0.11 | -0.01 | -0.17 | -0.15 | 0.03  | -0.01 | 0.00  | -0.01 | -0.01 | 0.02  | 0.08  | 0.01  | 0.04  | -0.01 | 0.01  | 0.01  | -0.18 | -0.04 | -0.08 | 0.19  | -0.14 | -0.01 | -0.01 |       | -0.01 | 0.08  | -0.23 | -0.03 | -0.20 | -0.17 | -0.13   | 0.15  | 0.02  |       |
| Be   | -0.02 | -0.02 | 0.00  | -0.02 | -0.02 | -0.02 | -0.02 | -0.02 | -0.01 | -0.01 | -0.01 | 0.03  | 0.00  | 0.02  | 0.44  | -0.01 | -0.01 | -0.02 | -0.01 | -0.02 | 0.01  | -0.01 | 0.01  | -0.02 | -0.01 | 0.00  | -0.01 |       | 0.07  | 0.03  | -0.01 | -0.02 | -0.02 | 0.00    | -0.02 | 0.01  |       |
| Bi   | -0.02 | -0.01 | -0.02 | -0.02 | -0.03 | -0.02 | -0.02 | 0.04  | -0.01 | -0.01 | -0.01 | 0.46  | 0.08  | 0.09  | -0.01 | -0.02 | -0.03 | -0.02 | -0.01 | -0.01 | -0.01 | -0.01 | 0.01  | -0.01 | 0.00  | 0.00  | -0.01 | 0.07  |       | 0.02  | 0.03  | -0.02 | 0.00  | -0.02   | -0.03 | -0.02 | -0.01 |
| Si   | 0.18  | 0.23  | 0.32  | -0.10 | 0.24  | 0.09  | 0.19  | -0.03 | -0.03 | -0.11 | -0.04 | 0.01  | 0.02  | 0.20  | -0.07 | 0.14  | -0.10 | 0.16  | 0.12  | 0.01  | 0.27  | -0.09 | 0.01  | -0.11 | 0.05  | 0.04  | 0.08  | 0.03  | 0.02  |       | -0.11 | -0.05 | 0.08  | -0.07   | -0.07 | 0.02  | 0.06  |
| Pb   | 0.28  | 0.30  | 0.19  | 0.54  | 0.00  | 0.45  | 0.31  | 0.07  | -0.04 | -0.05 | 0.09  | -0.02 | -0.06 | -0.05 | 0.01  | 0.04  | 0.03  | 0.02  | -0.05 | 0.23  | 0.10  | 0.15  | -0.38 | 0.51  | -0.03 | -0.03 | -0.23 | -0.01 | 0.03  | -0.11 |       | -0.01 | 0.34  | 0.53    | 0.14  | -0.06 | 0.09  |
| U    | 0.00  | 0.00  | 0.00  | -0.01 | 0.10  | -0.02 | 0.05  | -0.08 | 0.01  | -0.03 | -0.01 | 0.00  | -0.04 | -0.05 | -0.07 | -0.02 | 0.30  | -0.06 | -0.09 | 0.01  | -0.05 | -0.02 | -0.01 | -0.01 | 0.02  | -0.02 | -0.03 | -0.02 | -0.02 | -0.05 | -0.01 |       | -0.04 | -0.03   | 0.29  | -0.04 | 0.00  |
| NH4  | 0.66  | 0.65  | 0.57  | 0.34  | 0.39  | 0.67  | 0.53  | 0.01  | -0.06 | 0.13  | 0.46  | -0.05 | 0.01  | -0.04 | -0.10 | 0.08  | 0.14  | 0.02  | -0.10 | 0.53  | 0.06  | 0.35  | -0.31 | 0.49  | 0.00  | -0.01 | -0.20 | -0.02 | 0.00  | 0.08  | 0.34  | -0.04 |       | 0.58    | 0.29  | -0.14 | 0.08  |
| Br   | 0.57  | 0.55  | 0.34  | 0.90  | 0.06  | 0.83  | 0.47  | -0.03 | -0.04 | -0.02 | 0.28  | -0.04 | -0.01 | -0.05 | -0.07 | 0.10  | 0.20  | 0.01  | -0.06 | 0.35  | 0.08  | 0.74  | -0.26 | 0.94  | -0.02 | -0.02 | -0.17 | -0.02 | -0.02 | -0.07 | 0.53  | -0.03 | 0.58  |         | 0.22  | -0.11 | 0.05  |
| F    | 0.32  | 0.14  | 0.23  | 0.12  | 0.42  | 0.24  | 0.29  | 0.01  | -0.09 | 0.07  | 0.05  | 0.00  | -0.03 | -0.11 | -0.16 | -0.09 | 0.52  | -0.09 | -0.19 | 0.43  | -0.06 | 0.18  | -0.14 | 0.22  | 0.06  | 0.07  | -0.13 | 0.00  | -0.03 | -0.07 | 0.14  | 0.29  | 0.29  |         | -0.22 | 0.17  |       |
| NO3  | -0.12 | -0.06 | -0.07 | -0.03 | -0.03 | -0.11 | -0.09 | -0.01 | 0.00  | -0.04 | -0.07 | 0.04  | 0.01  | -0.03 | 0.10  | -0.03 | -0.16 | -0.03 | 0.05  | -0.13 | -0.07 | -0.07 | 0.05  | -0.10 | -0.02 | -0.03 | 0.15  | -0.02 | -0.02 | 0.02  | -0.06 | -0.04 | -0.14 | -0.11</ |       |       |       |

CORRELATION MATRIX FOR THE SUBSET (51 SAMPLES)

|      | Na    | Mg    | K     | Ca    | HCO3  | Cl    | SO4   | Al    | Sb    | Ag    | Ba    | Cd    | Cr    | Co    | Cu    | Mn    | Mo    | Ni    | Zn    | B     | Fe    | Li    | Se    | Sr    | Sn    | Ti    | V     | Be    | Bi    | Si    | Pb    | U     | NH4   | Br    | F     | NO3   | P     |      |
|------|-------|-------|-------|-------|-------|-------|-------|-------|-------|-------|-------|-------|-------|-------|-------|-------|-------|-------|-------|-------|-------|-------|-------|-------|-------|-------|-------|-------|-------|-------|-------|-------|-------|-------|-------|-------|-------|------|
| Na   |       | 0.86  | 0.86  | 0.31  | 0.47  | 0.91  | 0.78  | -0.03 | -0.05 | 0.07  | 0.13  | -0.04 | 0.02  | -0.05 | -0.10 | 0.05  | 0.21  | 0.02  | -0.07 | 0.53  | 0.04  | 0.32  | -0.22 | 0.43  | 0.03  | 0.00  | -0.16 | -0.02 | -0.02 | 0.18  | 0.28  | 0.00  | 0.66  | 0.57  | 0.32  | -0.12 | 0.08  |      |
| Mg   | 0.86  |       | 0.83  | 0.35  | 0.40  | 0.84  | 0.78  | -0.06 | -0.04 | -0.01 | 0.24  | -0.03 | 0.00  | -0.03 | -0.07 | 0.09  | 0.13  | 0.06  | -0.05 | 0.39  | 0.04  | 0.28  | -0.16 | 0.46  | -0.01 | -0.01 | -0.09 | -0.02 | -0.01 | 0.23  | 0.30  | 0.00  | 0.65  | 0.55  | 0.14  | -0.06 | 0.04  |      |
| K    | 0.86  | 0.83  |       | 0.12  | 0.60  | 0.71  | 0.73  | -0.01 | -0.05 | 0.08  | 0.09  | -0.04 | -0.03 | -0.02 | -0.07 | 0.06  | 0.07  | 0.05  | -0.08 | 0.42  | 0.10  | 0.15  | -0.18 | 0.18  | 0.04  | 0.01  | -0.08 | 0.00  | -0.02 | 0.32  | 0.19  | 0.00  | 0.57  | 0.34  | 0.23  | -0.07 | 0.08  |      |
| Ca   | 0.31  | 0.35  | 0.12  |       | 0.00  | 0.65  | 0.34  | -0.04 | -0.03 | -0.04 | 0.21  | -0.03 | -0.02 | -0.02 | -0.05 | 0.16  | 0.17  | 0.01  | -0.06 | 0.17  | 0.08  | 0.71  | -0.20 | 0.93  | -0.03 | -0.02 | -0.11 | -0.02 | -0.02 | -0.10 | 0.54  | -0.01 | 0.34  | 0.90  | 0.12  | -0.03 | 0.03  |      |
| HCO3 | 0.47  | 0.40  | 0.60  | 0.00  |       | 0.29  | 0.37  | -0.01 | -0.06 | 0.25  | 0.10  | -0.01 | -0.04 | -0.02 | -0.12 | 0.08  | 0.15  | 0.02  | -0.19 | 0.40  | -0.01 | 0.01  | -0.13 | -0.01 | 0.12  | 0.13  | -0.01 | -0.02 | -0.03 | 0.24  | 0.00  | 0.10  | 0.39  | 0.06  | 0.42  | -0.03 | 0.17  |      |
| Cl   | 0.91  | 0.84  | 0.71  | 0.65  | 0.29  |       | 0.74  | -0.04 | -0.05 | 0.01  | 0.21  | -0.05 | 0.01  | -0.05 | -0.09 | 0.10  | 0.22  | 0.02  | -0.05 | 0.46  | 0.07  | 0.52  | -0.24 | 0.73  | 0.00  | -0.02 | -0.17 | -0.02 | -0.02 | 0.09  | 0.45  | -0.02 | 0.67  | 0.83  | 0.24  | -0.11 | 0.06  |      |
| SO4  | 0.78  | 0.78  | 0.73  | 0.34  | 0.37  | 0.74  |       | -0.04 | -0.04 | -0.03 | -0.02 | -0.03 | 0.01  | -0.05 | -0.09 | 0.04  | 0.24  | 0.03  | -0.06 | 0.34  | 0.00  | 0.22  | -0.21 | 0.41  | 0.02  | -0.02 | -0.15 | -0.02 | -0.02 | 0.19  | 0.31  | 0.05  | 0.53  | 0.47  | 0.29  | -0.09 | 0.04  |      |
| Al   | -0.03 | -0.06 | -0.01 | -0.04 | -0.01 | -0.04 | -0.04 |       | -0.02 | -0.01 | -0.08 | -0.01 | -0.03 | 0.02  | 0.01  | -0.04 | -0.04 | -0.01 | -0.03 | 0.00  | -0.03 | -0.04 | -0.06 | -0.03 | 0.03  | 0.03  | -0.02 | 0.04  | -0.03 | 0.07  | -0.08 | 0.01  | -0.03 | 0.01  | -0.01 | 0.40  |       |      |
| Sb   | -0.05 | -0.04 | -0.05 | -0.03 | -0.06 | -0.05 | -0.04 | -0.02 |       | 0.01  | -0.02 | -0.02 | -0.02 | -0.02 | 0.12  | -0.04 | -0.01 | -0.01 | 0.15  | -0.05 | -0.02 | -0.02 | 0.02  | -0.04 | 0.19  | -0.01 | -0.01 | -0.01 | -0.01 | -0.03 | -0.04 | 0.01  | -0.06 | -0.04 | -0.09 | 0.00  | 0.08  |      |
| Ag   | 0.07  | -0.01 | 0.08  | -0.04 | 0.25  | 0.01  | -0.03 | -0.01 | 0.01  |       | -0.02 | 0.00  | 0.00  | -0.02 | 0.01  | -0.02 | 0.09  | -0.03 | -0.03 | 0.06  | -0.02 | -0.01 | 0.03  | -0.03 | 0.01  | -0.01 | 0.00  | -0.01 | -0.01 | -0.11 | -0.05 | -0.03 | 0.13  | -0.02 | 0.07  | -0.04 | -0.02 |      |
| Ba   | 0.13  | 0.24  | 0.09  | 0.21  | 0.10  | 0.21  | -0.02 | -0.08 | -0.02 | -0.02 |       | -0.02 | 0.06  | 0.09  | -0.02 | -0.03 | 0.04  | -0.01 | -0.04 | -0.08 | 0.20  | 0.00  | 0.27  | -0.07 | 0.32  | -0.03 | -0.01 | -0.01 | -0.01 | -0.01 | -0.04 | 0.09  | -0.01 | 0.46  | 0.28  | 0.05  | -0.07 | 0.03 |
| Cd   | -0.04 | -0.03 | -0.04 | -0.03 | -0.01 | -0.05 | -0.03 | -0.01 | -0.02 | 0.00  | -0.02 |       | 0.02  | 0.06  | 0.00  | 0.01  | -0.04 | 0.02  | 0.01  | -0.04 | -0.02 | -0.03 | 0.02  | -0.03 | -0.01 | -0.01 | -0.01 | 0.03  | 0.46  | 0.01  | -0.02 | 0.00  | -0.05 | -0.04 | 0.00  | 0.04  | -0.03 |      |
| Cr   | 0.02  | 0.00  | -0.03 | -0.02 | -0.04 | 0.01  | 0.01  | -0.03 | -0.02 | 0.00  | -0.02 | 0.02  |       | 0.09  | -0.03 | 0.07  | 0.06  | 0.49  | 0.00  | 0.00  | 0.03  | 0.01  | 0.03  | 0.01  | 0.02  | -0.01 | 0.02  | 0.00  | 0.08  | 0.02  | -0.06 | -0.04 | 0.01  | -0.01 | -0.03 | 0.01  | -0.02 |      |
| Co   | -0.05 | -0.03 | -0.02 | -0.02 | -0.02 | -0.05 | -0.05 | 0.02  | -0.02 | -0.02 | -0.03 | 0.06  | 0.09  |       | -0.03 | 0.74  | -0.05 | 0.27  | 0.18  | -0.05 | 0.23  | -0.03 | 0.02  | -0.05 | -0.01 | -0.01 | 0.08  | 0.02  | 0.09  | 0.20  | -0.05 | -0.05 | -0.04 | -0.05 | -0.11 | -0.03 | -0.03 |      |
| Cu   | -0.10 | -0.07 | -0.07 | -0.05 | -0.12 | -0.09 | -0.09 | 0.01  | 0.12  | 0.01  | -0.03 | 0.00  | -0.03 | -0.03 |       | -0.07 | -0.10 | 0.02  | 0.03  | -0.10 | -0.03 | -0.05 | 0.02  | -0.07 | -0.02 | -0.02 | 0.01  | 0.44  | -0.01 | -0.07 | 0.01  | -0.07 | -0.10 | -0.07 | -0.16 | 0.10  | -0.02 |      |
| Mn   | 0.05  | 0.09  | 0.06  | 0.16  | 0.08  | 0.10  | 0.04  | -0.04 | -0.04 | -0.02 | 0.04  | 0.01  | 0.07  | 0.74  | -0.07 |       | 0.03  | 0.29  | 0.08  | -0.03 | 0.35  | 0.03  | -0.02 | 0.12  | -0.02 | 0.00  | 0.04  | -0.01 | -0.02 | 0.14  | 0.04  | -0.02 | 0.08  | 0.10  | -0.09 | -0.03 | -0.04 |      |
| Mo   | 0.21  | 0.13  | 0.07  | 0.17  | 0.15  | 0.22  | 0.24  | -0.04 | -0.01 | 0.09  | -0.01 | -0.04 | 0.06  | -0.05 | -0.10 | 0.03  |       | -0.06 | -0.08 | 0.15  | -0.06 | 0.17  | -0.06 | 0.23  | 0.06  | 0.02  | -0.01 | -0.01 | -0.03 | -0.10 | 0.03  | 0.30  | 0.14  | 0.20  | 0.52  | -0.16 | 0.06  |      |
| Ni   | 0.02  | 0.06  | 0.05  | 0.01  | 0.02  | 0.02  | 0.03  | -0.01 | -0.01 | -0.03 | -0.04 | 0.02  | 0.49  | 0.27  | 0.02  | 0.29  | -0.06 |       | 0.15  | -0.02 | 0.22  | -0.02 | -0.01 | 0.00  | -0.01 | -0.01 | 0.01  | -0.02 | -0.02 | 0.16  | 0.02  | -0.06 | 0.02  | 0.01  | -0.09 | -0.03 | -0.05 |      |
| Zn   | -0.07 | -0.05 | -0.08 | -0.06 | -0.19 | -0.05 | -0.06 | -0.03 | 0.15  | -0.03 | -0.08 | 0.01  | 0.00  | 0.18  | 0.03  | 0.08  | -0.08 | 0.15  |       | -0.10 | 0.23  | -0.04 | 0.05  | -0.05 | -0.01 | -0.03 | 0.01  | -0.01 | -0.01 | 0.12  | -0.05 | -0.09 | -0.10 | -0.06 | -0.19 | 0.05  | -0.05 |      |
| B    | 0.53  | 0.39  | 0.42  | 0.17  | 0.40  | 0.46  | 0.34  | 0.00  | -0.05 | 0.06  | 0.20  | -0.04 | 0.00  | -0.05 | -0.10 | -0.03 | 0.15  | -0.02 | -0.10 |       | 0.01  | 0.40  | -0.25 | 0.28  | 0.03  | 0.02  | -0.18 | -0.02 | -0.01 | 0.01  | 0.23  | 0.01  | 0.53  | 0.35  | 0.43  | -0.13 | 0.09  |      |
| Fe   | 0.04  | 0.04  | 0.10  | 0.08  | -0.01 | 0.07  | 0.00  | -0.03 | -0.02 | -0.02 | 0.00  | -0.02 | 0.03  | 0.23  | -0.03 | 0.35  | -0.06 | 0.22  | 0.23  | 0.01  |       | 0.02  | 0.01  | 0.06  | -0.02 | 0.01  | -0.04 | 0.01  | -0.01 | 0.27  | 0.10  | -0.05 | 0.06  | 0.08  | -0.06 | -0.07 | -0.02 |      |
| Li   | 0.32  | 0.28  | 0.15  | 0.71  | 0.01  | 0.52  | 0.22  | -0.04 | -0.02 | -0.01 | 0.27  | -0.03 | 0.01  | -0.03 | -0.05 | 0.03  | 0.17  | -0.02 | -0.04 | 0.40  | 0.02  |       | -0.10 | 0.72  | -0.02 | -0.01 | -0.08 | -0.01 | -0.01 | -0.09 | 0.15  | -0.02 | 0.35  | 0.74  | 0.18  | -0.07 | 0.02  |      |
| Se   | -0.22 | -0.16 | -0.18 | -0.20 | -0.13 | -0.24 | -0.21 | -0.06 | 0.02  | 0.03  | -0.07 | 0.02  | 0.03  | 0.02  | 0.02  | -0.02 | -0.06 | -0.01 | 0.05  | -0.25 | 0.01  | -0.10 |       | -0.21 | 0.01  | 0.01  | 0.19  | 0.01  | 0.01  | 0.01  | -0.38 | -0.01 | -0.31 | -0.26 | -0.14 | 0.05  | -0.08 |      |
| Sr   | 0.43  | 0.46  | 0.18  | 0.93  | -0.01 | 0.73  | 0.41  | -0.03 | -0.04 | -0.03 | 0.32  | -0.03 | 0.01  | -0.05 | -0.07 | 0.12  | 0.23  | 0.00  | -0.05 | 0.28  | 0.06  | 0.72  | -0.21 |       | -0.02 | -0.02 | -0.14 | -0.02 | -0.01 | -0.11 | 0.51  | -0.01 | 0.49  | 0.94  | 0.22  | -0.10 | 0.04  |      |
| Sn   | 0.03  | -0.01 | 0.04  | -0.03 | 0.12  | 0.00  | 0.02  | -0.01 | 0.19  | 0.01  | -0.03 | -0.01 | 0.02  | -0.01 | -0.02 | 0.06  | -0.01 | -0.01 | 0.03  | -0.02 | -0.02 | 0.01  | -0.02 | -0.02 | -0.01 | -0.01 | -0.01 | 0.00  | 0.05  | -0.03 | 0.02  | 0.00  | -0.02 | 0.06  | -0.02 | 0.03  |       |      |
| Ti   | 0.00  | -0.01 | 0.01  | -0.02 | 0.13  | -0.02 | -0.02 | 0.30  | -0.01 | -0.01 | -0.01 | -0.01 | -0.01 | -0.01 | -0.02 | 0.00  | 0.02  | -0.01 | -0.03 | 0.02  | 0.01  | -0.01 | 0.01  | -0.02 | -0.01 | -0.01 | 0.00  | 0.04  | -0.03 | -0.02 | -0.01 | -0.02 | 0.07  | -0.03 | 0.55  |       |       |      |
| V    | -0.16 | -0.09 | -0.08 | -0.11 | -0.01 | -0.17 | -0.15 | 0.03  | -0.01 | 0.00  | -0.01 | -0.01 | 0.02  | 0.08  | 0.01  | 0.04  | -0.01 | 0.01  | 0.01  | -0.18 | -0.04 | -0.08 | 0.19  | -0.14 | -0.01 | -0.01 |       | -0.01 | -0.01 | 0.08  | -0.23 | -0.03 | -0.20 | -0.17 | -0.13 | 0.15  | 0.02  |      |
| Be   | -0.02 | -0.02 | 0.00  | -0.02 | -0.02 | -0.02 | -0.02 | -0.02 | -0.01 | -0.01 | -0.01 | 0.03  | 0.00  | 0.02  | 0.44  | -0.01 | -0.01 | -0.02 | -0.01 | -0.02 | 0.01  | -0.01 | 0.01  | -0.02 | -0.01 | 0.00  | -0.01 | 0.07  |       | 0.03  | -0.01 | -0.02 | -0.02 | 0.00  | -0.02 | 0.01  |       |      |
| Bi   | -0.02 | -0.01 | -0.02 | -0.02 | -0.03 | -0.02 | -0.02 | 0.04  | -0.01 | -0.01 | -0.01 | 0.46  | 0.08  | 0.09  | -0.01 | -0.02 | -0.03 | -0.02 | -0.01 | -0.01 | -0.01 | -0.01 | 0.01  | -0.01 | 0.00  | 0.00  | -0.01 | 0.07  | 0.02  | 0.03  | -0.02 | 0.00  | -0.02 | -0.03 | -0.02 | -0.01 |       |      |
| Si   | 0.18  | 0.23  | 0.32  | -0.10 | 0.24  | 0.09  | 0.19  | -0.03 | -0.03 | -0.11 | -0.04 | 0.01  | 0.02  | 0.20  | -0.07 | 0.14  | -0.10 | 0.16  | 0.12  | 0.01  | 0.27  | -0.09 | 0.01  | -0.11 | 0.05  | 0.04  | 0.08  | 0.03  | 0.02  |       | -0.11 | -0.05 | 0.08  | -0.07 | -0.07 | 0.02  | 0.06  |      |
| Pb   | 0.28  | 0.30  | 0.19  | 0.54  | 0.00  | 0.45  | 0.31  | 0.07  | -0.04 | -0.05 | 0.09  | -0.02 | -0.06 | -0.05 | 0.01  | 0.04  | 0.03  | 0.02  | -0.05 | 0.23  | 0.10  | 0.15  | -0.38 | 0.51  | -0.03 | -0.03 | -0.23 | -0.01 | 0.03  | -0.11 |       | -0.01 | 0.34  | 0.53  | 0.14  | -0.06 | 0.09  |      |
| U    | 0.00  | 0.00  | 0.00  | -0.01 | 0.10  | -0.02 | 0.05  | -0.08 | 0.01  | -0.03 | -0.01 | 0.00  | -0.04 | -0.05 | -0.07 | -0.02 | 0.30  | -0.06 | -0.09 | 0.01  | -0.05 | -0.02 | -0.01 | -0.01 | 0.02  | -0.02 | -0.03 | -0.02 | -0.02 | -0.05 | -0.01 |       | -0.04 | -0.03 | 0.29  | -0.04 | 0.00  |      |
| NH4  | 0.66  | 0.65  | 0.57  | 0.34  | 0.39  | 0.67  | 0.53  | 0.01  | -0.06 | 0.13  | 0.46  | -0.05 | 0.01  | -0.04 | -0.10 | 0.08  | 0.14  | 0.02  | -0.10 | 0.53  | 0.06  | 0.35  | -0.31 | 0.49  | 0.00  | -0.01 | -0.20 | -0.02 | 0.00  | 0.08  | 0.34  | -0.04 |       | 0.58  | 0.29  | -0.14 | 0.08  |      |
| Br   | 0.57  | 0.55  | 0.34  | 0.90  | 0.06  | 0.83  | 0.47  | -0.03 | -0.04 | -0.02 | 0.28  | -0.04 | -0.01 | -0.05 | -0.07 | 0.10  | 0.20  | 0.01  | -0.06 | 0.35  | 0.08  | 0.74  | -0.26 | 0.94  | -0.02 | -0.02 | -0.17 | -0.02 | -0.02 | -0.07 | 0.53  | -0.03 | 0.58  |       | 0.22  | -0.11 | 0.05  |      |
| F    | 0.32  | 0.14  | 0.23  | 0.12  | 0.42  | 0.24  | 0.29  | 0.01  | -0.09 | 0.07  | 0.05  | 0.00  | -0.03 | -0.11 | -0.16 | -0.09 | 0.52  | -0.09 | -0.19 | 0.43  | -0.06 | 0.18  | -0.14 | 0.22  | 0.06  | 0.07  | -0.13 | 0.00  | -0.03 | -0.07 | 0.14  | 0.29  | 0.29  | 0.22  |       | -0.22 | 0.17  |      |
| NO3  | -0.12 | -0.06 | -0.07 | -0.03 | -0.03 | -0.11 | -0.09 | -0.01 | 0.00  | -0.04 | -0.07 | 0.04  | 0.01  | -0.03 | 0.10  | -0.03 | -0.16 | -0.03 | 0.05  | -0.13 | -0.07 | -0.07 |       |       |       |       |       |       |       |       |       |       |       |       |       |       |       |      |
