# Supplementary material
Source: MDPI journal article supplement (https://www.mdpi.com/2076-3263/9/3/139)

Appendix 4.

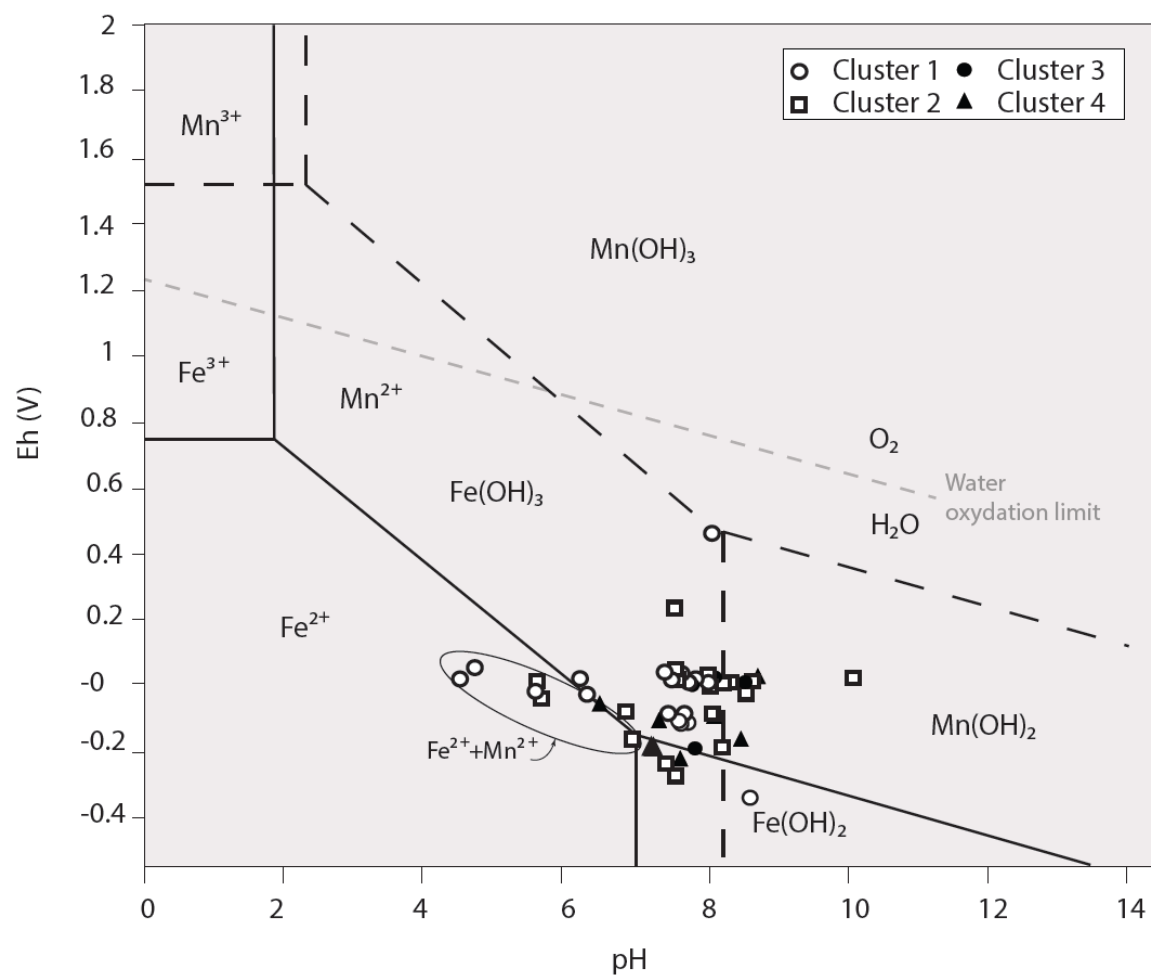

Supplement: s1 [file s1]
